# Supplementary material for: Highly electrocatalytic counter electrodes based on carbon black for cobalt(iii)/(ii)-mediated dye-sensitized solar cells
Source: Royal Society of Chemistry journal article supplement (doi:10.1039/c6ta08818j), 2016-11-14
Supplement: c6ta08818j1.pdf [file c6ta08818j1.pdf]

## ***Supplementary Information***

# Highly Electrocatalytic Counter Electrodes Based on Carbon Black for Cobalt(III)/(II)-Mediated Dye- Sensitized Solar Cells

I-Ping Liu,<sup>a</sup> Yi-Chen Hou,<sup>a</sup> Chiao-Wei Li<sup>a</sup> and Yuh-Lang Lee<sup>\*ab</sup>

<sup>a</sup>Department of Chemical Engineering, National Cheng Kung University, Tainan 70101, Taiwan (R. O. C.)

<sup>b</sup>Research Center for Energy Technology and Strategy (RCETS), National Cheng Kung University, Tainan 70101, Taiwan (R. O. C.)

\*Corresponding author. Department of Chemical Engineering, National Cheng Kung University, Tainan 70101, Taiwan (R. O. C.).

*E-mail address:* ylee@mail.ncku.edu.tw (Y.-L. Lee)

## Experimental section

### Materials

Carbon black powders (PRINTEX®L, furnace black, 99%) were obtained from Orion Engineered Carbons; according to the manufacturer's specifications, the properties of this powder include BET surface area of 150 m<sup>2</sup> g<sup>-1</sup>, DBP absorption of 120 ml per 100 g CB, pH value of 9.0, toluene extraction less than 0.1% (8 h), sieve residue less than 25 ppm (45 µm residue) and a particle diameter of ~23 nm. The amphiphilic ruthenium Z907 dye, *cis*-bis(isothiocyanato)-(2,2'-bipyridyl-4,4'-dicarboxylato)-(4,4'-di-nonyl-2'-bipyridyl) ruthenium(II), was acquired from Solaronix, and the organic Y123 dye, 3-{6-[4-*bis*(2',4'-dihexyloxybiphenyl-4-yl)amino-]phenyl}-4,4-dihexyl-cyclopenta-[2,1-*b*:3,4-*b'*]dithiophene-2-yl}-2-cyanoacrylic acid, was purchased from Dyenamo. Titanium dioxide pastes of PST-18NR and PST-400C were obtained from JGC C&C (JGC Catalysts and Chemicals Ltd., Japan), and the 30 NR-D paste was acquired from Dyesol. 2,2'-Bipyridyl (99+%), cobalt(II) chloride hexahydrate (CoCl<sub>2</sub>·6H<sub>2</sub>O, 98%) and nitrosyl tetrafluoroborate (NOBF<sub>4</sub>, 98%) were purchased from Alfa Aesar. Chenodeoxycholic acid (CDCA, C<sub>24</sub>H<sub>40</sub>O<sub>4</sub>, 97%), dimethyl sulfoxide [DMSO, (CH<sub>3</sub>)<sub>2</sub>SO, 99.9%], ethyl cellulose (EC, 30-60 mPa·s, 48%), *tert*-butanol [(CH<sub>3</sub>)<sub>3</sub>COH, 99%] and 4-*tert*-butylpyridine (tBP, C<sub>9</sub>H<sub>13</sub>N, 96%) were obtained from Sigma-Aldrich. Lithium perchlorate (LiClO<sub>4</sub>, 98%) and titanium(IV) chloride (TiCl<sub>4</sub>, 98%) were purchased from Fluka. Acetonitrile (CH<sub>3</sub>CN, 99.5%), ammonium hexafluorophosphate (NH<sub>4</sub>PF<sub>6</sub>, 99.99%) and tetrabutylammonium hexafluorophosphate (TBAPF<sub>6</sub>, 98%) were acquired from Riedel-de Haën, Aldrich Chemistry and Tokyo Chemical Industry, respectively. Ethanol (99.9%) and methanol (99.8%) were purchased from J. T. Baker. All chemicals were used as received without further purification.

### Preparation of Dye-Sensitized Photoelectrodes

Mesoporous titanium dioxide (TiO<sub>2</sub>) films were screen-printed onto the cleaned FTO substrates. Prior to printing the TiO<sub>2</sub> films, a pre-treatment was adopted to coat a compact layer on the FTO substrates. This was performed by immersing the cleaned FTO in a 40 mM aqueous TiCl<sub>4</sub> solution at 70°C for 30 min and then rinsing it with deionized water and ethanol. The TiO<sub>2</sub> films with a double-layered architecture, consisting of a transparent layer and a light scattering layer, were employed. Pastes of PST-18NR and 30 NR-D were introduced to prepare the transparent layers of  $4.0 \pm 0.2$  and  $7.5 \pm 0.4$   $\mu\text{m}$ -thick for the Z907 and Y123 photoelectrodes, respectively. A  $4.0 \pm 0.2$   $\mu\text{m}$ -thick scattering layer was further printed onto transparent layers using the PST-400C paste. A sintering process at 500°C was applied to all as-prepared TiO<sub>2</sub> electrodes, after which the electrodes were immersed in the Z907 dye solution for 6 h or in the Y123 solution for 15 h to perform the dye sensitization. The Z907 solution was composed of 0.5 mM Z907 dye and 50 mM CDCA in a *tert*-butanol/acetonitrile/DMSO mixture (9/9/2 by volume), and the Y123 solution was 0.1 mM Y123 dye in a *tert*-butanol/acetonitrile mixture (1/1 by volume).

**Table S1.** Comparison of efficient Z907 DSSCs using various CB counter electrodes in conjunction with the  $\text{Co}(\text{bpy})_3^{2+/3+}$  redox couple irradiated under standard 1 sun.

| Counter Electrode | $J_{\text{sc}}$<br>( $\text{mA cm}^{-2}$ ) | $V_{\text{oc}}$<br>(mV) | FF   | $\eta$<br>(%) |
|-------------------|--------------------------------------------|-------------------------|------|---------------|
| CB-1-H            | 11.81                                      | 852                     | 0.71 | 7.14          |
| CB-2-H            | 11.79                                      | 853                     | 0.71 | 7.14          |
| CB-3-H            | 11.74                                      | 853                     | 0.72 | 7.21          |
| CB-4-H            | 11.80                                      | 854                     | 0.71 | 7.15          |
| STCB-1-H          | 11.72                                      | 829                     | 0.63 | 6.12          |

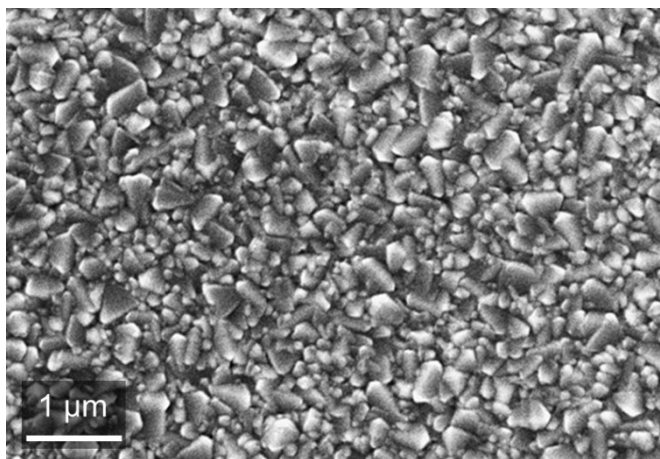

**Fig. S1** Top-view SEM image of a pristine FTO conductive glass.

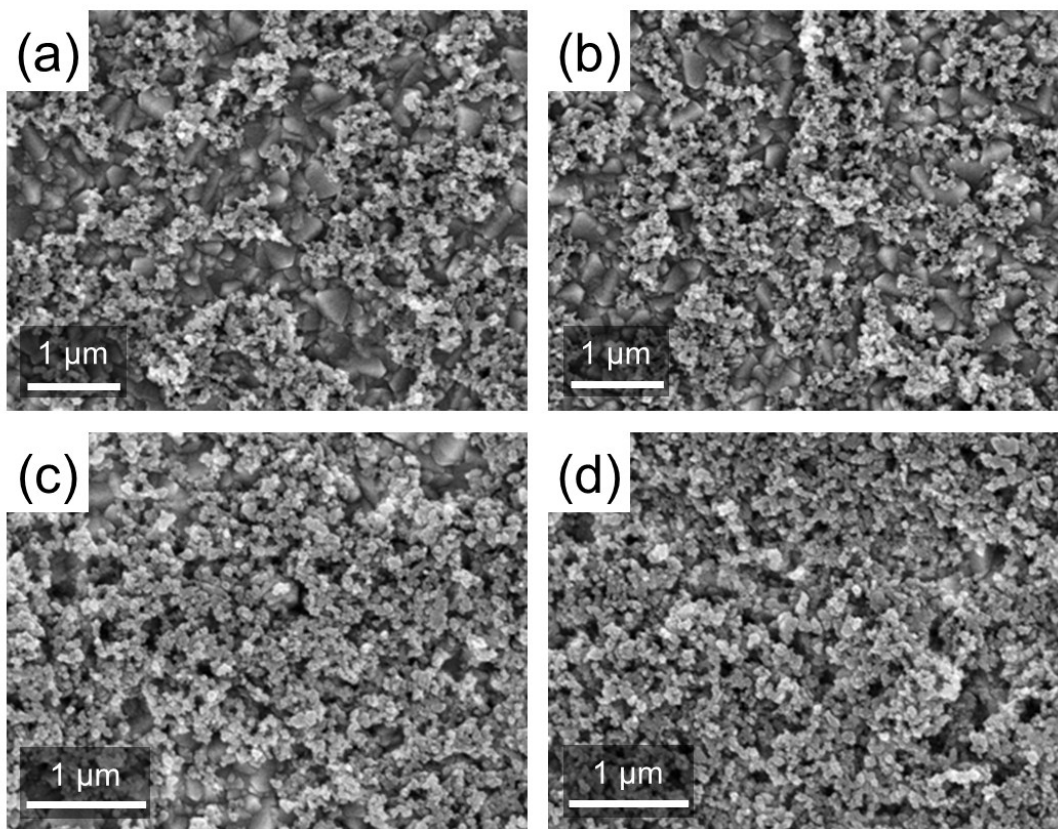

**Fig. S2** Top-view SEM images of (a) CB-1-H, (b) CB-2-H, (c) CB-3-H and (d) CB-4-H films.

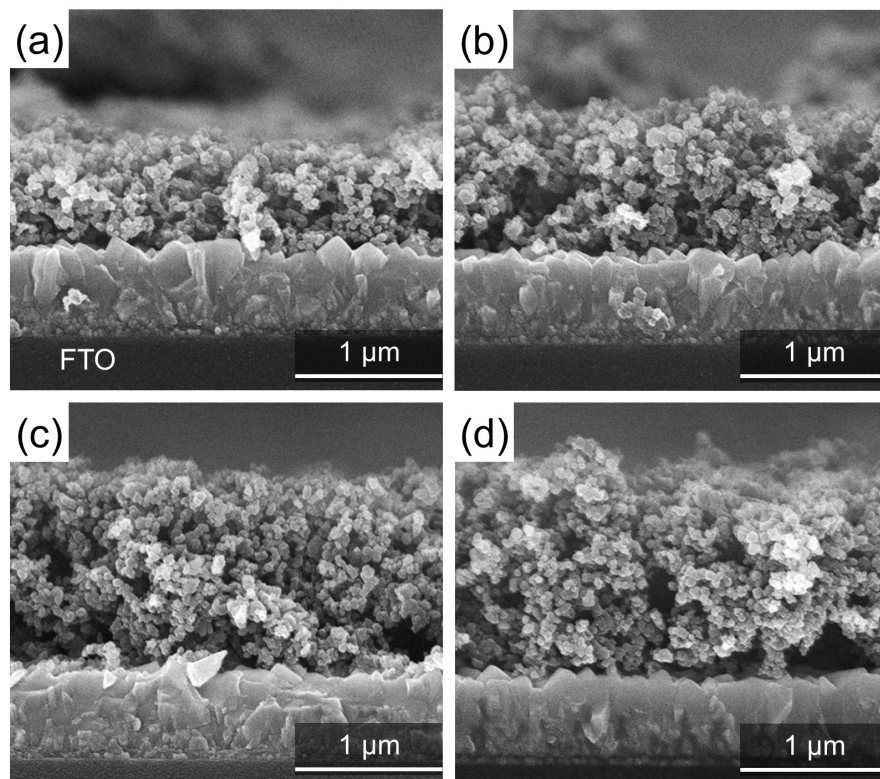

**Fig. S3** Cross-sectional SEM images of (a) CB-1-H, (b) CB-2-H, (c) CB-3-H and (d) CB-4-H films.

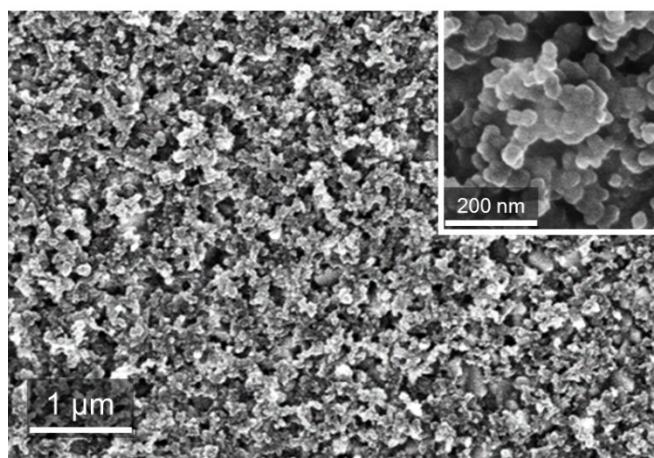

**Fig. S4** Top-view SEM image of the CB-1 film with its magnified structure.

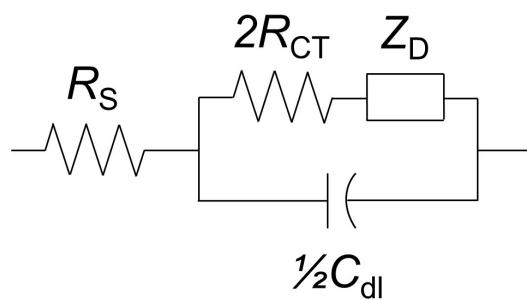

**Fig. S5** Equivalent circuit employed for fitting the Nyquist spectra of dummy cells.

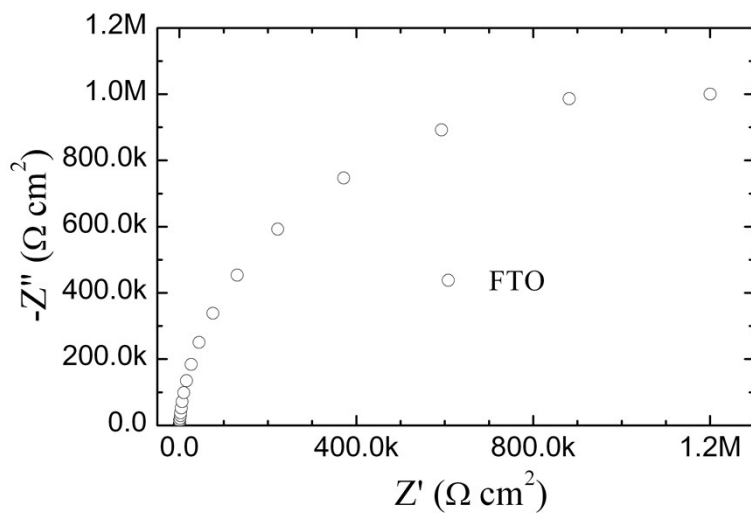

**Fig. S6** Nyquist plot at 0 V of a bare FTO symmetrical dummy cell.

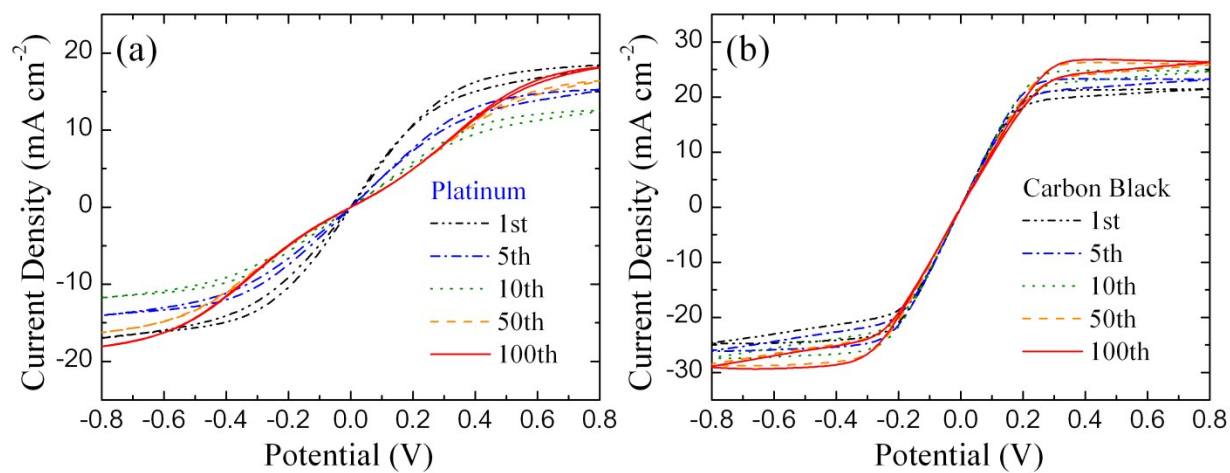

**Fig. S7** Cyclic voltammograms of (a) Pt-105 and (b) CB-1-H electrodes measured using symmetrical dummy cells at a scan rate of  $50 \text{ mV sec}^{-1}$  with repeated potential cycles.

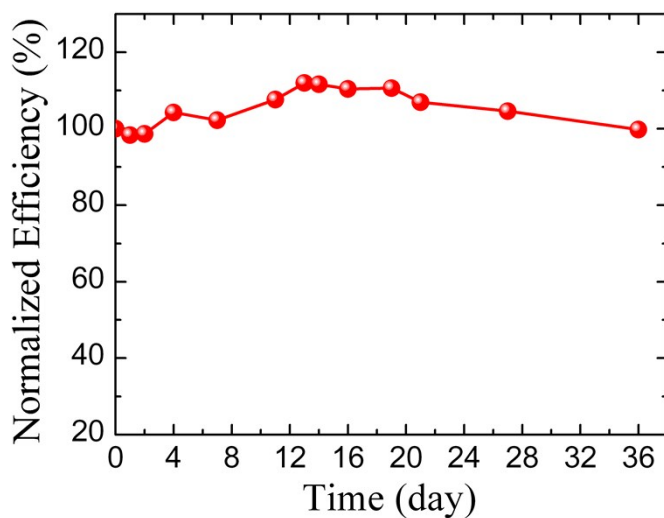

**Fig. S8** Long-term stability of Z907 DSSC equipped with a CB-1-H counter electrode measured under ambient conditions.

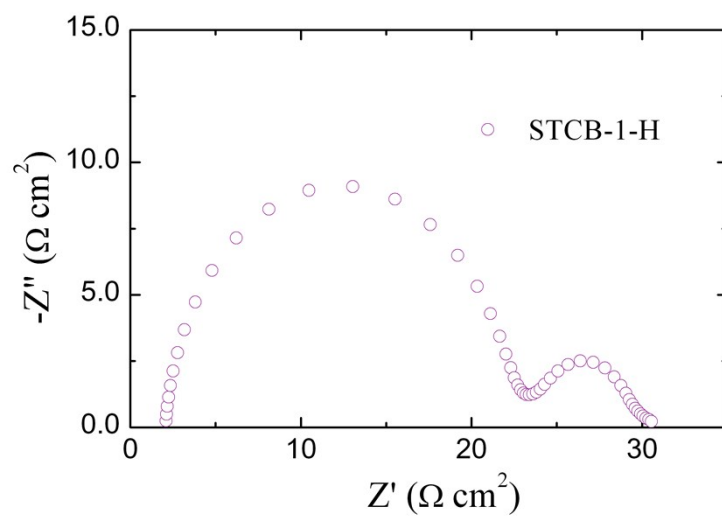

**Fig. S9** Nyquist plot at 0 V of a dummy cell fabricated using STCB-1-H electrodes.

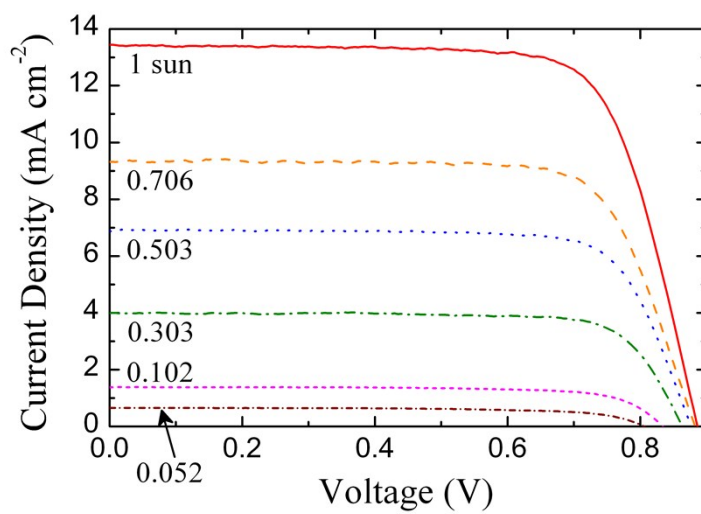

**Fig. S10** Photovoltaic  $J$ - $V$  curves of Y123 DSSC employing a CB-1-H counter electrode measured under different light intensities (in sun).
